# Supplementary material for: Differential Effects of IGF-1R Small Molecule Tyrosine Kinase Inhibitors BMS-754807 and OSI-906 on Human Cancer Cell Lines
Source: PubMed Central journal article supplement (PMC7763458; doi:10.3390/cancers12123717), 2020-12-11
Supplement: cancers-12-03717-s001.pdf [file cancers-12-03717-s001.pdf]

## Supplementary Materials: Differential Effects of IGF-1R Small Molecule Tyrosine Kinase Inhibitors BMS-754807 and OSI-906 on Human Cancer Cell Lines

María Fuentes-Baile, María P. Ventero, José A. Encinar, Pilar García-Morales, María Poveda-Deltell, Elizabeth Pérez-Valenciano, Víctor M. Barberá, Javier Gallego-Plazas, Álvaro Rodríguez-Lescure, José Martín-Nieto and Miguel Saceda

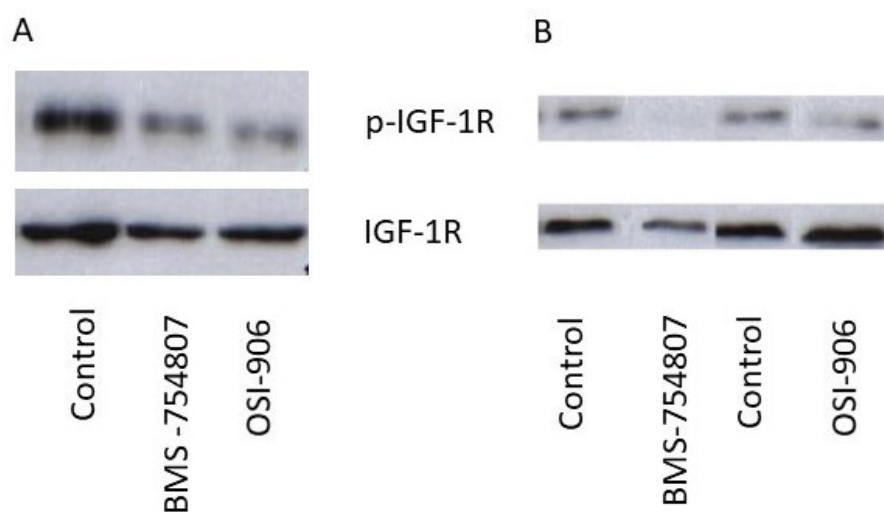

**Figure S1.** RWP-1 cell extracts cells were grown in 10% FBS-containing media (FBS). Then, cells were non-treated (control), or pre-treated with 500 nM (**panel A**) or 10  $\mu$ M (**panel B**) BMS-754807 or OSI-906 for 6 hours. Proteins were extracted and subjected to Western blot using antibodies against phospho-IGF-1R (Tyr 1161 from Signalway Antibody# 11087) and IGF-1R (Santa Cruz Biotechnology sc-713).

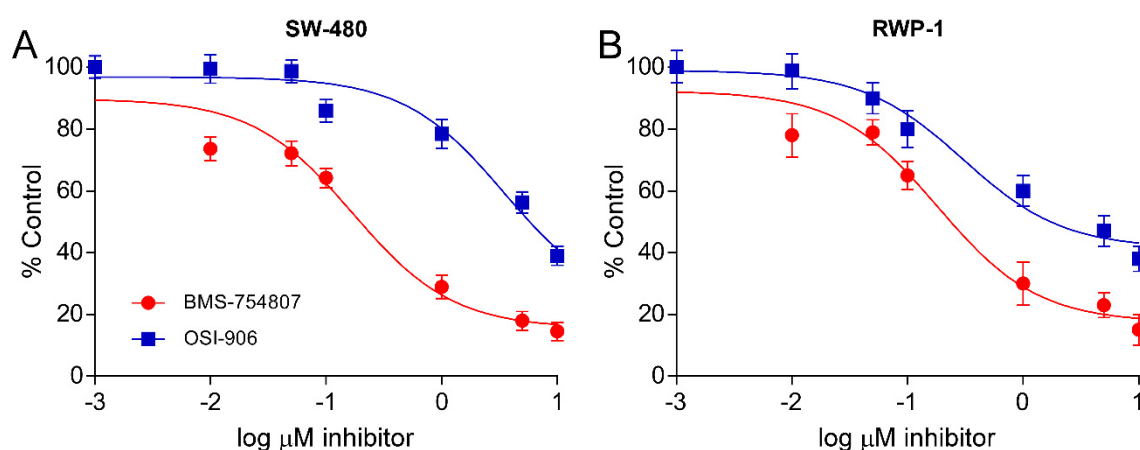

**Figure S2.** Dose-response effect of BMS-754807 and OSI-906 on cell proliferation in SW480 and RWP-1 cell lines. The indicated cell lines were treated with 0.01–10  $\mu$ M BMS-754807 or OSI-906 for 72 h and cell proliferation was evaluated by the MTT assay. Data represent the mean  $\pm$  SEM ( $n \geq 6$ ) of viable cells percentage with respect to untreated controls, taken as 100%.

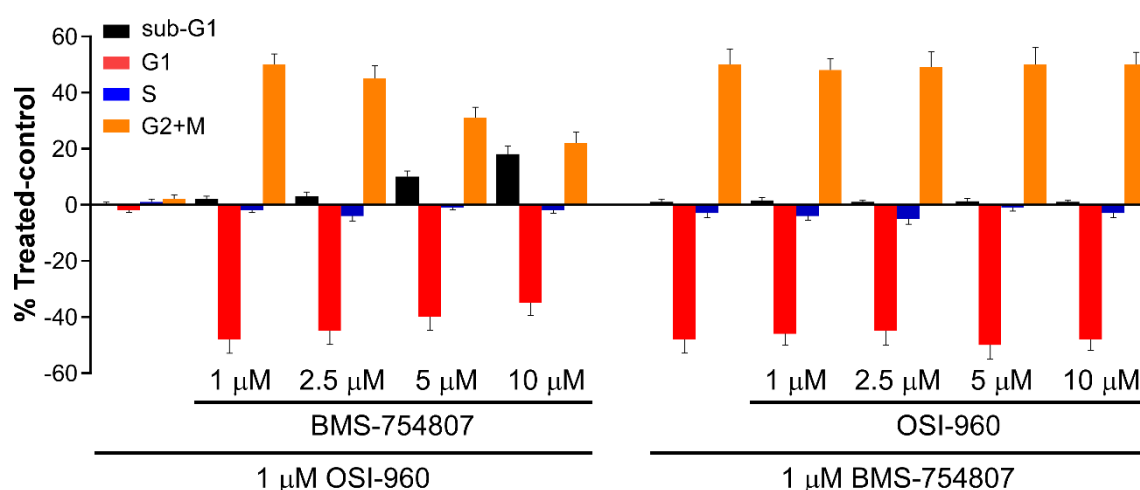

**Figure S3.** BMS-754807 and OSI-960 effect on cell cycle distribution on IMIM-PC-2 pancreatic carcinoma cell line. The IMIM-PC-2 cells were treated with increasing concentrations 1–10 μM of OSI-960 or BMS-754807, in the presence of a constant concentration of 1 μM of the alternative inhibitor (BMS-754807 or OSI-960 respectively) for 24 h and cell cycle distribution was analyzed by flow cytometry. Data represent the mean ± SEM of the percentages of treated cells minus those of the control cells with a  $n \geq 3$ .

**Table S1.** List of PDB codes of the structures used in the molecular docking experiments for the different protein kinases analyzed in this study. The results of  $\Delta G$  included in Figure 7 arise from averaging the values obtained in molecular docking experiments with all the structures listed in the table for each protein analyzed. For each PDB entry, the experimental method (X-ray diffraction data only), the resolution Å, and the position of the amino acids of the resolved structure are included.

| Protein: PTK6, UniProt code: Q13882 |        |                |           | Protein: SRC, UniProt code: P12931 |        |                |           |
|-------------------------------------|--------|----------------|-----------|------------------------------------|--------|----------------|-----------|
| PDB entry                           | Method | Resolution (Å) | Positions | PDB entry                          | Method | Resolution (Å) | Positions |
| 5D7V                                | X-ray  | 2.33           | 185–446   | 2H8H                               | X-ray  | 2.2            | 2–536     |
| 5DA3                                | X-ray  | 1.7            | 185–446   | 1YOJ                               | X-ray  | 1.95           | 254–536   |
| 5H2U                                | X-ray  | 2.24           | 185–446   | 1YOL                               | X-ray  | 2.3            | 254–536   |
| Protein: mTor, UniProt code: P42345 |        |                |           | 1YOM                               | X-ray  | 2.9            | 254–536   |
| PDB entry                           | Method | Resolution (Å) | Positions | 4MXO                               | X-ray  | 2.1            | 254–536   |
| 4JSN                                | X-ray  | 3.2            | 1376–2549 | 4MXX                               | X-ray  | 2.6            | 254–536   |
| 4JSP                                | X-ray  | 3.3            | 1376–2549 | 4MXY                               | X-ray  | 2.58           | 254–536   |
| 4JSV                                | X-ray  | 3.5            | 1376–2549 | 4MXZ                               | X-ray  | 2.58           | 254–536   |
| 4JSX                                | X-ray  | 3.5            | 1376–2549 | 2BDF                               | X-ray  | 2.1            | 258–536   |
| 4JT5                                | X-ray  | 3.45           | 1376–2549 | 2BDJ                               | X-ray  | 2.5            | 258–536   |
| 4JT6                                | X-ray  | 3.6            | 1376–2549 | 1YI6                               | X-ray  | 2              | 261–536   |
| 5WBU                                | X-ray  | 3.42           | 1376–2549 | 1FMK                               | X-ray  | 1.5            | 86–536    |
| 5WBY                                | X-ray  | 3.1            | 1376–2549 | 1KSW                               | X-ray  | 2.8            | 86–536    |
| Protein: CHK2, UniProt code: O96017 |        |                |           | 1Y57                               | X-ray  | 1.91           | 86–536    |
| PDB entry                           | Method | Resolution (Å) | Positions | 2SRC                               | X-ray  | 1.5            | 86–536    |
| 2CN5                                | X-ray  | 2.25           | 210–531   | 4K11                               | X-ray  | 2.3            | 87–534    |
| 2CN8                                | X-ray  | 2.7            | 210–531   | Protein: HCK, UniProt code: P08631 |        |                |           |
| 2W0J                                | X-ray  | 2.05           | 210–531   | PDB entry                          | Method | Resolution (Å) | Positions |
| 2W7X                                | X-ray  | 2.07           | 210–531   | 5H0B                               | X-ray  | 1.65           | 81–526    |
| 2WTC                                | X-ray  | 3              | 210–531   | 5H0H                               | X-ray  | 1.72           | 81–526    |
| 2WTD                                | X-ray  | 2.75           | 210–531   | 5H0G                               | X-ray  | 1.8            | 81–526    |
| 2WTI                                | X-ray  | 2.5            | 210–531   | 5H09                               | X-ray  | 1.95           | 81–526    |
| 2WTJ                                | X-ray  | 2.1            | 210–531   | 2HK5                               | X-ray  | 2              | 247–514   |
|                                     |        |                |           | 1QCF                               | X-ray  | 2              | 81–526    |

|                                                  |        |                |           |
|--------------------------------------------------|--------|----------------|-----------|
| 2XBJ                                             | X-ray  | 2.3            | 210–531   |
| 2XK9                                             | X-ray  | 2.35           | 210–531   |
| 2XM8                                             | X-ray  | 3.4            | 210–531   |
| 2XM9                                             | X-ray  | 2.5            | 210–531   |
| 2YCF                                             | X-ray  | 1.77           | 210–530   |
| 2YCQ                                             | X-ray  | 2.05           | 210–531   |
| 2YCR                                             | X-ray  | 2.2            | 210–531   |
| 2YCS                                             | X-ray  | 2.35           | 210–531   |
| 2YIQ                                             | X-ray  | 1.89           | 210–531   |
| 2YIR                                             | X-ray  | 2.1            | 210–531   |
| 2YIT                                             | X-ray  | 2.2            | 210–531   |
| 3I6U                                             | X-ray  | 3              | 84–502    |
| 3I6W                                             | X-ray  | 3.25           | 70–512    |
| 4A9R                                             | X-ray  | 2.85           | 210–531   |
| 4A9S                                             | X-ray  | 2.66           | 210–531   |
| 4A9T                                             | X-ray  | 2.7            | 210–531   |
| 4A9U                                             | X-ray  | 2.48           | 210–531   |
| 4BDA                                             | X-ray  | 2.6            | 210–531   |
| 4BDB                                             | X-ray  | 2.5            | 210–531   |
| 4BDC                                             | X-ray  | 3              | 210–531   |
| 4BDD                                             | X-ray  | 2.67           | 210–531   |
| 4BDE                                             | X-ray  | 2.55           | 210–531   |
| 4BDF                                             | X-ray  | 2.7            | 210–531   |
| 4BDG                                             | X-ray  | 2.84           | 210–531   |
| 4BDH                                             | X-ray  | 2.7            | 210–531   |
| 4BDI                                             | X-ray  | 2.32           | 210–531   |
| 4BDJ                                             | X-ray  | 3.01           | 210–531   |
| 4BDK                                             | X-ray  | 3.3            | 210–531   |
| <b>Protein: AKT2, UniProt code: P31751</b>       |        |                |           |
| PDB entry                                        | Method | Resolution (Å) | Positions |
| 1GZK                                             | X-ray  | 2.3            | 146–460   |
| 1GZN                                             | X-ray  | 2.5            | 146–480   |
| 1GZO                                             | X-ray  | 2.75           | 146–460   |
| 1MRV                                             | X-ray  | 2.8            | 143–481   |
| 1MRY                                             | X-ray  | 2.8            | 143–481   |
| 1O6K                                             | X-ray  | 1.7            | 146–481   |
| 1O6L                                             | X-ray  | 1.6            | 146–467   |
| 2JDO                                             | X-ray  | 1.8            | 146–467   |
| 2JDR                                             | X-ray  | 2.3            | 146–467   |
| 2UW9                                             | X-ray  | 2.1            | 146–467   |
| 2X39                                             | X-ray  | 1.93           | 146–467   |
| 2XH5                                             | X-ray  | 2.72           | 146–479   |
| 3D0E                                             | X-ray  | 2              | 146–480   |
| 3E87                                             | X-ray  | 2.3            | 146–480   |
| 3E88                                             | X-ray  | 2.5            | 146–480   |
| 3E8D                                             | X-ray  | 2.7            | 146–480   |
| <b>Protein: P38 alpha, UniProt code: Q16539</b>  |        |                |           |
| PDB entry                                        | Method | Resolution (Å) | Positions |
| 2FST                                             | X-ray  | 1.45           | 2–360     |
| 3LFF                                             | X-ray  | 1.5            | 2–360     |
| 3OEF                                             | X-ray  | 1.6            | 1–360     |
| 5WJJ                                             | X-ray  | 1.6            | 1–360     |
| 3ZS5                                             | X-ray  | 1.6            | 2–360     |
| 4EHV                                             | X-ray  | 1.6            | 2–360     |
| 5H0E                                             | X-ray  | 2.1            | 81–526    |
| 2C0T                                             | X-ray  | 2.15           | 81–526    |
| 3VS3                                             | X-ray  | 2.17           | 81–526    |
| 3VRZ                                             | X-ray  | 2.22           | 81–526    |
| 2C0I                                             | X-ray  | 2.3            | 81–526    |
| 3VS6                                             | X-ray  | 2.37           | 81–526    |
| 3VS1                                             | X-ray  | 2.46           | 81–526    |
| 3VRY                                             | X-ray  | 2.48           | 81–526    |
| 1AD5                                             | X-ray  | 2.6            | 79–526    |
| 3VS2                                             | X-ray  | 2.61           | 81–526    |
| 3VS4                                             | X-ray  | 2.75           | 81–526    |
| 2C0O                                             | X-ray  | 2.85           | 81–526    |
| 3VS5                                             | X-ray  | 2.85           | 81–526    |
| 4LUD                                             | X-ray  | 2.85           | 81–526    |
| 3VS0                                             | X-ray  | 2.93           | 81–526    |
| 2HCK                                             | X-ray  | 3              | 79–526    |
| 3VS7                                             | X-ray  | 3              | 81–526    |
| 4LUE                                             | X-ray  | 3.04           | 81–526    |
| <b>Protein: FYN, UniProt code: P06241</b>        |        |                |           |
| PDB entry                                        | Method | Resolution (Å) | Positions |
| 2DQ7                                             | X-ray  | 2.8            | 261–537   |
| <b>Protein: AKT1, UniProt code: P31749</b>       |        |                |           |
| PDB entry                                        | Method | Resolution (Å) | Positions |
| 6CCY                                             | X-ray  | 2.18           | 144–466   |
| 3CQU                                             | X-ray  | 2.2            | 144–480   |
| 3CQW                                             | X-ray  | 2              | 144–480   |
| 3MV5                                             | X-ray  | 2.47           | 144–480   |
| 3MVH                                             | X-ray  | 2.01           | 144–480   |
| 3OCB                                             | X-ray  | 2.7            | 144–480   |
| 3OW4                                             | X-ray  | 2.6            | 144–480   |
| 3QKK                                             | X-ray  | 2.3            | 144–480   |
| 3QKL                                             | X-ray  | 1.9            | 144–480   |
| 3QKM                                             | X-ray  | 2.2            | 144–480   |
| 4EKK                                             | X-ray  | 2.8            | 144–480   |
| 4EKL                                             | X-ray  | 2              | 144–480   |
| 4GV1                                             | X-ray  | 1.49           | 144–480   |
| 3O96                                             | X-ray  | 2.7            | 2–443     |
| 4EJN                                             | X-ray  | 2.19           | 2–446     |
| 5KCV                                             | X-ray  | 2.7            | 2–446     |
| <b>Protein: GSK-3 beta, UniProt code: P49841</b> |        |                |           |
| PDB entry                                        | Method | Resolution (Å) | Positions |
| 1J1B                                             | X-ray  | 1.8            | 1–420     |
| 1Q5K                                             | X-ray  | 1.94           | 7–420     |
| 4AFJ                                             | X-ray  | 1.98           | 27–393    |
| 4PTE                                             | X-ray  | 2.03           | 1–420     |
| 4NM3                                             | X-ray  | 2.1            | 1–383     |
| 1J1C                                             | X-ray  | 2.1            | 1–420     |
| 1Q41                                             | X-ray  | 2.1            | 2–420     |
| 3DU8                                             | X-ray  | 2.2            | 1–420     |
| 1Q3D                                             | X-ray  | 2.2            | 2–420     |
| 5K5N                                             | X-ray  | 2.2            | 28–384    |
| 4ACC                                             | X-ray  | 2.21           | 1–420     |
| 3SAY                                             | X-ray  | 2.23           | 1–420     |

|      |       |      |       |      |       |      |        |
|------|-------|------|-------|------|-------|------|--------|
| 4GEO | X-ray | 1.66 | 2–360 | 1R0E | X-ray | 2.25 | 35–420 |
| 3FMK | X-ray | 1.7  | 1–360 | 4NM5 | X-ray | 2.3  | 13–383 |
| 3ROC | X-ray | 1.7  | 1–360 | 4NM7 | X-ray | 2.3  | 13–383 |
| 5XYX | X-ray | 1.7  | 1–360 | 1Q3W | X-ray | 2.3  | 2–420  |
| 2FSL | X-ray | 1.7  | 2–360 | 3I4B | X-ray | 2.3  | 7–420  |
| 2QD9 | X-ray | 1.7  | 2–360 | 4J71 | X-ray | 2.31 | 1–420  |
| 3K3I | X-ray | 1.7  | 5–352 | 2JLD | X-ray | 2.35 | 1–420  |
| 2RG6 | X-ray | 1.72 | 2–360 | 4PTG | X-ray | 2.36 | 1–420  |
| 2GFS | X-ray | 1.75 | 2–360 | 3ZRK | X-ray | 2.37 | 23–393 |
| 2ZAZ | X-ray | 1.8  | 1–360 | 1PYX | X-ray | 2.4  | 1–420  |
| 3FL4 | X-ray | 1.8  | 1–360 | 5KPK | X-ray | 2.4  | 1–420  |
| 3FLY | X-ray | 1.8  | 1–360 | 3GB2 | X-ray | 2.4  | 34–383 |
| 3GC7 | X-ray | 1.8  | 1–360 | 3F7Z | X-ray | 2.4  | 35–383 |
| 3KQ7 | X-ray | 1.8  | 1–360 | 1O9U | X-ray | 2.4  | 35–384 |
| 5MTX | X-ray | 1.8  | 1–360 | 5HLP | X-ray | 2.45 | 1–420  |
| 1WBS | X-ray | 1.8  | 2–360 | 3ZRL | X-ray | 2.48 | 23–393 |
| 2NPQ | X-ray | 1.8  | 2–360 | 3ZRM | X-ray | 2.49 | 23–393 |
| 3HUC | X-ray | 1.8  | 2–360 | 4NM0 | X-ray | 2.5  | 1–383  |
| 4AA0 | X-ray | 1.8  | 2–360 | 5F94 | X-ray | 2.51 | 36–385 |
| 3S3I | X-ray | 1.8  | 4–352 | 5F95 | X-ray | 2.52 | 36–385 |
| 2FSO | X-ray | 1.83 | 2–360 | 4ACD | X-ray | 2.6  | 1–420  |
| 5N68 | X-ray | 1.85 | 1–360 | 4ACG | X-ray | 2.6  | 1–420  |
| 4F9Y | X-ray | 1.85 | 2–360 | 4ACH | X-ray | 2.6  | 1–420  |
| 2FSM | X-ray | 1.86 | 2–360 | 5KPL | X-ray | 2.6  | 1–420  |
| 4E5A | X-ray | 1.87 | 1–360 | 6B8J | X-ray | 2.6  | 1–420  |
| 3HL7 | X-ray | 1.88 | 1–360 | 1GNG | X-ray | 2.6  | 27–393 |
| 3NNW | X-ray | 1.89 | 1–354 | 4DIT | X-ray | 2.6  | 27–393 |
| 3MPT | X-ray | 1.89 | 1–360 | 3F88 | X-ray | 2.6  | 35–383 |
| 3ZSG | X-ray | 1.89 | 2–360 | 3ZDI | X-ray | 2.64 | 35–384 |
| 3D83 | X-ray | 1.9  | 1–360 | 5KPM | X-ray | 2.69 | 1–420  |
| 3FLN | X-ray | 1.9  | 1–360 | 1I09 | X-ray | 2.7  | 1–420  |
| 3FLQ | X-ray | 1.9  | 1–360 | 4J1R | X-ray | 2.7  | 1–420  |
| 3FMH | X-ray | 1.9  | 1–360 | 3Q3B | X-ray | 2.7  | 2–420  |
| 3FMN | X-ray | 1.9  | 1–360 | 3SD0 | X-ray | 2.7  | 35–384 |
| 3ZYA | X-ray | 1.9  | 1–360 | 4PTC | X-ray | 2.71 | 1–420  |
| 5ML5 | X-ray | 1.9  | 1–360 | 1Q4L | X-ray | 2.77 | 2–420  |
| 5N67 | X-ray | 1.9  | 1–360 | 4B7T | X-ray | 2.77 | 35–384 |
| 4DLI | X-ray | 1.91 | 2–360 | 1UV5 | X-ray | 2.8  | 35–384 |
| 2Y8O | X-ray | 1.95 | 1–360 | 1H8F | X-ray | 2.8  | 35–386 |
| 3HLL | X-ray | 1.95 | 1–360 | 2OW3 | X-ray | 2.8  | 35–386 |
| 3HV6 | X-ray | 1.95 | 2–360 | 5T31 | X-ray | 2.85 | 1–420  |
| 3CTQ | X-ray | 1.95 | 5–352 | 3L1S | X-ray | 2.9  | 7–420  |
| 4KIN | X-ray | 1.97 | 2–360 | 3PUP | X-ray | 2.99 | 1–420  |
| 1R3C | X-ray | 2    | 1–360 | 5HLN | X-ray | 3.1  | 1–420  |
| 1ZYJ | X-ray | 2    | 1–360 | 4IQ6 | X-ray | 3.12 | 1–420  |
| 1ZZ2 | X-ray | 2    | 1–360 | 3M1S | X-ray | 3.13 | 1–420  |
| 2I0H | X-ray | 2    | 1–360 | 5OY4 | X-ray | 3.2  | 1–420  |
| 3E92 | X-ray | 2    | 1–360 | 2O5K | X-ray | 3.2  | 29–393 |

**Protein: IGF-1R, UniProt code: P08069**

| PDB entry | Method | Resolution (Å) | Positions |
|-----------|--------|----------------|-----------|
| 1P4O      | X-ray  | 1.5            | 974–1294  |
| 3LW0      | X-ray  | 1.79           | 983–1286  |
| 5FXS      | X-ray  | 1.9            | 980–1286  |
| 2OJ9      | X-ray  | 2              | 982–1286  |
| 3I81      | X-ray  | 2.08           | 982–1286  |

**Protein: IGF-1R, UniProt code: P08069**

| PDB entry | Method | Resolution (Å) | Positions |
|-----------|--------|----------------|-----------|
| 4CFE      | X-ray  | 3.02           | 1–552     |
| 4CFF      | X-ray  | 3.92           | 1–552     |
| 4ZHX      | X-ray  | 2.99           | 2–552     |
| 5ISO      | X-ray  | 2.63           | 1–552     |
| 6B1U      | X-ray  | 2.77           | 2–552     |

|      |       |      |          |      |       |     |       |
|------|-------|------|----------|------|-------|-----|-------|
| 1JQH | X-ray | 2.1  | 979–1286 | 6B2E | X-ray | 3.8 | 2–552 |
| 3O23 | X-ray | 2.1  | 982–1286 |      |       |     |       |
| 4D2R | X-ray | 2.1  | 985–1286 |      |       |     |       |
| 1K3A | X-ray | 2.1  | 988–1286 |      |       |     |       |
| 3NW7 | X-ray | 2.11 | 982–1286 |      |       |     |       |
| 3NW5 | X-ray | 2.14 | 982–1286 |      |       |     |       |
| 3NW6 | X-ray | 2.2  | 982–1286 |      |       |     |       |
| 5HZN | X-ray | 2.2  | 983–1286 |      |       |     |       |
| 5FXQ | X-ray | 2.3  | 980–1286 |      |       |     |       |
| 3D94 | X-ray | 2.3  | 986–1286 |      |       |     |       |
| 5FXR | X-ray | 2.4  | 980–1286 |      |       |     |       |
| 2ZM3 | X-ray | 2.5  | 981–1286 |      |       |     |       |
| 1M7N | X-ray | 2.7  | 974–1294 |      |       |     |       |
| 3F5P | X-ray | 2.9  | 981–1286 |      |       |     |       |
| 3QQU | X-ray | 2.9  | 988–1286 |      |       |     |       |
| 3LVP | X-ray | 3    | 951–1286 |      |       |     |       |

**Publisher’s Note:** MDPI stays neutral with regard to jurisdictional claims in published maps and institutional affiliations.

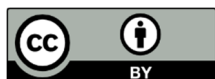

© 2020 by the authors. Licensee MDPI, Basel, Switzerland. This article is an open access article distributed under the terms and conditions of the Creative Commons Attribution (CC BY) license (<http://creativecommons.org/licenses/by/4.0/>).
